# Supplementary material for: Prevalence and risk factors of schistosomiasis among primary school children in four selected regions of The Gambia
Source: PubMed Central journal article supplement (PMC8139473; doi:10.1371/journal.pntd.0009380), 2021-05-11
Supplement: pntd.0009380.s001.pdf [file pntd.0009380.s001.pdf]

## Gambia AFRO Individual v3 (eng)

| Variable Name      | Question Text                               | Saved Value                                                                                                                                                                                                                                                                                                                                         |   |         |   |            |   |              |   |            |   |               |   |                    |   |                    |
|--------------------|---------------------------------------------|-----------------------------------------------------------------------------------------------------------------------------------------------------------------------------------------------------------------------------------------------------------------------------------------------------------------------------------------------------|---|---------|---|------------|---|--------------|---|------------|---|---------------|---|--------------------|---|--------------------|
| meta               | Hidden from user                            |                                                                                                                                                                                                                                                                                                                                                     |   |         |   |            |   |              |   |            |   |               |   |                    |   |                    |
| instanceID         | Hidden from user                            |                                                                                                                                                                                                                                                                                                                                                     |   |         |   |            |   |              |   |            |   |               |   |                    |   |                    |
| Q1_Recorder        | Enter Recorder ID                           | User entered integer                                                                                                                                                                                                                                                                                                                                |   |         |   |            |   |              |   |            |   |               |   |                    |   |                    |
| Q2_Diseases        | Select disease(s) surveyed at this location | <table border="1"> <tr> <td>1</td> <td>LF only</td> </tr> <tr> <td>2</td> <td>Oncho only</td> </tr> <tr> <td>3</td> <td>LF and Oncho</td> </tr> <tr> <td>4</td> <td>LF and Loa</td> </tr> <tr> <td>5</td> <td>Loa and Oncho</td> </tr> <tr> <td>6</td> <td>LF, Loa, and Oncho</td> </tr> <tr> <td>7</td> <td>Schisto and/or STH</td> </tr> </table> | 1 | LF only | 2 | Oncho only | 3 | LF and Oncho | 4 | LF and Loa | 5 | Loa and Oncho | 6 | LF, Loa, and Oncho | 7 | Schisto and/or STH |
| 1                  | LF only                                     |                                                                                                                                                                                                                                                                                                                                                     |   |         |   |            |   |              |   |            |   |               |   |                    |   |                    |
| 2                  | Oncho only                                  |                                                                                                                                                                                                                                                                                                                                                     |   |         |   |            |   |              |   |            |   |               |   |                    |   |                    |
| 3                  | LF and Oncho                                |                                                                                                                                                                                                                                                                                                                                                     |   |         |   |            |   |              |   |            |   |               |   |                    |   |                    |
| 4                  | LF and Loa                                  |                                                                                                                                                                                                                                                                                                                                                     |   |         |   |            |   |              |   |            |   |               |   |                    |   |                    |
| 5                  | Loa and Oncho                               |                                                                                                                                                                                                                                                                                                                                                     |   |         |   |            |   |              |   |            |   |               |   |                    |   |                    |
| 6                  | LF, Loa, and Oncho                          |                                                                                                                                                                                                                                                                                                                                                     |   |         |   |            |   |              |   |            |   |               |   |                    |   |                    |
| 7                  | Schisto and/or STH                          |                                                                                                                                                                                                                                                                                                                                                     |   |         |   |            |   |              |   |            |   |               |   |                    |   |                    |
| Q3_Community_code1 | Enter community/village code                | User entered integer                                                                                                                                                                                                                                                                                                                                |   |         |   |            |   |              |   |            |   |               |   |                    |   |                    |
| Q4_Community_code2 | Enter community/village code again          | User entered integer                                                                                                                                                                                                                                                                                                                                |   |         |   |            |   |              |   |            |   |               |   |                    |   |                    |
| Q5_School_code1    | Enter school code                           | User entered integer                                                                                                                                                                                                                                                                                                                                |   |         |   |            |   |              |   |            |   |               |   |                    |   |                    |
| Q6_School_code2    | Enter school code again                     | User entered integer                                                                                                                                                                                                                                                                                                                                |   |         |   |            |   |              |   |            |   |               |   |                    |   |                    |
| Q7_Consent         | Select enrollment type                      | <table border="1"> <tr> <td>1</td> <td>Consent</td> </tr> <tr> <td>2</td> <td>Absent</td> </tr> <tr> <td>9</td> <td>Refused</td> </tr> </table>                                                                                                                                                                                                     | 1 | Consent | 2 | Absent     | 9 | Refused      |   |            |   |               |   |                    |   |                    |
| 1                  | Consent                                     |                                                                                                                                                                                                                                                                                                                                                     |   |         |   |            |   |              |   |            |   |               |   |                    |   |                    |
| 2                  | Absent                                      |                                                                                                                                                                                                                                                                                                                                                     |   |         |   |            |   |              |   |            |   |               |   |                    |   |                    |
| 9                  | Refused                                     |                                                                                                                                                                                                                                                                                                                                                     |   |         |   |            |   |              |   |            |   |               |   |                    |   |                    |
| Consent            | Hidden from user                            |                                                                                                                                                                                                                                                                                                                                                     |   |         |   |            |   |              |   |            |   |               |   |                    |   |                    |
| Q7a_Name           | Enter name                                  | User entered text                                                                                                                                                                                                                                                                                                                                   |   |         |   |            |   |              |   |            |   |               |   |                    |   |                    |
| Q8_Sex             | Select sex                                  | <table border="1"> <tr> <td>1</td> <td>Male</td> </tr> <tr> <td>2</td> <td>Female</td> </tr> </table>                                                                                                                                                                                                                                               | 1 | Male    | 2 | Female     |   |              |   |            |   |               |   |                    |   |                    |
| 1                  | Male                                        |                                                                                                                                                                                                                                                                                                                                                     |   |         |   |            |   |              |   |            |   |               |   |                    |   |                    |
| 2                  | Female                                      |                                                                                                                                                                                                                                                                                                                                                     |   |         |   |            |   |              |   |            |   |               |   |                    |   |                    |
| Q9_Age             | Enter age                                   | User entered integer                                                                                                                                                                                                                                                                                                                                |   |         |   |            |   |              |   |            |   |               |   |                    |   |                    |
| Q9a_Age_STH        | Enter age                                   | User entered integer                                                                                                                                                                                                                                                                                                                                |   |         |   |            |   |              |   |            |   |               |   |                    |   |                    |
| Q10a_Barcode       | Barcode scan or manual entry?               | <table border="1"> <tr> <td>1</td> <td>Scan</td> </tr> <tr> <td>2</td> <td>Manual</td> </tr> </table>                                                                                                                                                                                                                                               | 1 | Scan    | 2 | Manual     |   |              |   |            |   |               |   |                    |   |                    |
| 1                  | Scan                                        |                                                                                                                                                                                                                                                                                                                                                     |   |         |   |            |   |              |   |            |   |               |   |                    |   |                    |
| 2                  | Manual                                      |                                                                                                                                                                                                                                                                                                                                                     |   |         |   |            |   |              |   |            |   |               |   |                    |   |                    |
| Q10b_Scan          | Scan barcode                                | User captured barcode                                                                                                                                                                                                                                                                                                                               |   |         |   |            |   |              |   |            |   |               |   |                    |   |                    |

|                       |                                                                  |                                                                                                                                                                                                        |   |            |   |           |   |             |   |                  |
|-----------------------|------------------------------------------------------------------|--------------------------------------------------------------------------------------------------------------------------------------------------------------------------------------------------------|---|------------|---|-----------|---|-------------|---|------------------|
| Q10c_Manual1          | Enter barcode                                                    | User entered text                                                                                                                                                                                      |   |            |   |           |   |             |   |                  |
| Q10d_Manual2          | Enter barcode again                                              | User entered text                                                                                                                                                                                      |   |            |   |           |   |             |   |                  |
| Q11_How_long          | How long have you lived in this community/village?               | <table border="1"> <tr> <td>1</td> <td>10+ years</td> </tr> <tr> <td>2</td> <td>5-9 years</td> </tr> <tr> <td>3</td> <td>1-4 years</td> </tr> <tr> <td>4</td> <td>Less than 1 year</td> </tr> </table> | 1 | 10+ years  | 2 | 5-9 years | 3 | 1-4 years   | 4 | Less than 1 year |
| 1                     | 10+ years                                                        |                                                                                                                                                                                                        |   |            |   |           |   |             |   |                  |
| 2                     | 5-9 years                                                        |                                                                                                                                                                                                        |   |            |   |           |   |             |   |                  |
| 3                     | 1-4 years                                                        |                                                                                                                                                                                                        |   |            |   |           |   |             |   |                  |
| 4                     | Less than 1 year                                                 |                                                                                                                                                                                                        |   |            |   |           |   |             |   |                  |
| LF                    | Hidden from user                                                 |                                                                                                                                                                                                        |   |            |   |           |   |             |   |                  |
| Q12_Bednet            | Did you sleep under a bednet last night?                         | <table border="1"> <tr> <td>1</td> <td>Yes</td> </tr> <tr> <td>2</td> <td>No</td> </tr> </table>                                                                                                       | 1 | Yes        | 2 | No        |   |             |   |                  |
| 1                     | Yes                                                              |                                                                                                                                                                                                        |   |            |   |           |   |             |   |                  |
| 2                     | No                                                               |                                                                                                                                                                                                        |   |            |   |           |   |             |   |                  |
| Q12a_ITN              | Was the bednet treated with an insecticide when you obtained it? | <table border="1"> <tr> <td>1</td> <td>Yes</td> </tr> <tr> <td>2</td> <td>No</td> </tr> <tr> <td>7</td> <td>Do not know</td> </tr> </table>                                                            | 1 | Yes        | 2 | No        | 7 | Do not know |   |                  |
| 1                     | Yes                                                              |                                                                                                                                                                                                        |   |            |   |           |   |             |   |                  |
| 2                     | No                                                               |                                                                                                                                                                                                        |   |            |   |           |   |             |   |                  |
| 7                     | Do not know                                                      |                                                                                                                                                                                                        |   |            |   |           |   |             |   |                  |
| Prompt1               | Ask individual the following questions about LF morbidity        | User entered text                                                                                                                                                                                      |   |            |   |           |   |             |   |                  |
| Q14_Lymphedema        | Do you have lymphedema?                                          | <table border="1"> <tr> <td>1</td> <td>Yes</td> </tr> <tr> <td>2</td> <td>No</td> </tr> </table>                                                                                                       | 1 | Yes        | 2 | No        |   |             |   |                  |
| 1                     | Yes                                                              |                                                                                                                                                                                                        |   |            |   |           |   |             |   |                  |
| 2                     | No                                                               |                                                                                                                                                                                                        |   |            |   |           |   |             |   |                  |
| Q15_Lymphedema_upper  | Do you have lymphedema in the upper limbs?                       | <table border="1"> <tr> <td>1</td> <td>Yes</td> </tr> <tr> <td>2</td> <td>No</td> </tr> </table>                                                                                                       | 1 | Yes        | 2 | No        |   |             |   |                  |
| 1                     | Yes                                                              |                                                                                                                                                                                                        |   |            |   |           |   |             |   |                  |
| 2                     | No                                                               |                                                                                                                                                                                                        |   |            |   |           |   |             |   |                  |
| Q15a_Site             | Observe patient. Select upper limb lymphedema site               | <table border="1"> <tr> <td>1</td> <td>Unilateral</td> </tr> <tr> <td>2</td> <td>Bilateral</td> </tr> </table>                                                                                         | 1 | Unilateral | 2 | Bilateral |   |             |   |                  |
| 1                     | Unilateral                                                       |                                                                                                                                                                                                        |   |            |   |           |   |             |   |                  |
| 2                     | Bilateral                                                        |                                                                                                                                                                                                        |   |            |   |           |   |             |   |                  |
| Q16_Lymphedema_lower  | Do you have lymphedema in the lower limbs?                       | <table border="1"> <tr> <td>1</td> <td>Yes</td> </tr> <tr> <td>2</td> <td>No</td> </tr> </table>                                                                                                       | 1 | Yes        | 2 | No        |   |             |   |                  |
| 1                     | Yes                                                              |                                                                                                                                                                                                        |   |            |   |           |   |             |   |                  |
| 2                     | No                                                               |                                                                                                                                                                                                        |   |            |   |           |   |             |   |                  |
| Q16a_Site             | Observe patient. Select lower limb lymphedema site               | <table border="1"> <tr> <td>1</td> <td>Unilateral</td> </tr> <tr> <td>2</td> <td>Bilateral</td> </tr> </table>                                                                                         | 1 | Unilateral | 2 | Bilateral |   |             |   |                  |
| 1                     | Unilateral                                                       |                                                                                                                                                                                                        |   |            |   |           |   |             |   |                  |
| 2                     | Bilateral                                                        |                                                                                                                                                                                                        |   |            |   |           |   |             |   |                  |
| Q17_Lymphedema_breast | Do you have lymphedema in the breast?                            | <table border="1"> <tr> <td>1</td> <td>Yes</td> </tr> </table>                                                                                                                                         | 1 | Yes        |   |           |   |             |   |                  |
| 1                     | Yes                                                              |                                                                                                                                                                                                        |   |            |   |           |   |             |   |                  |

|                        |                                                                              |                      |                        |
|------------------------|------------------------------------------------------------------------------|----------------------|------------------------|
|                        |                                                                              | 2                    | No                     |
| Q17a_Site              | Select breast site                                                           | 1                    | Unilateral             |
|                        |                                                                              | 2                    | Bilateral              |
| Q18_Lymphedema_genital | Do you have lymphedema in the vulva or penis?                                | 1                    | Yes                    |
|                        |                                                                              | 2                    | No                     |
| Q19_Hydrocele          | Do you have hydrocele?                                                       | 1                    | Yes                    |
|                        |                                                                              | 2                    | No                     |
| Q20_Chyluria           | Do you have chyluria?                                                        | 1                    | Yes                    |
|                        |                                                                              | 2                    | No                     |
| Q20a_Chyluria_notes    | Enter specific chyluria notes                                                | User entered text    |                        |
| LFLoa                  | Hidden from user                                                             |                      |                        |
| Prompt2                | Ask individual the following questions about Loa loa                         | User entered text    |                        |
| Q21_Worms              | Have you ever experienced or noticed worms move along the white of your eye? | 1                    | Yes                    |
|                        |                                                                              | 2                    | No                     |
| Q22_Picture            | Have you ever had the condition in this picture?                             | 1                    | Yes                    |
|                        |                                                                              | 2                    | No                     |
| Q22a_Picture_freq      | How many times have you experienced this over the past year?                 | User entered integer |                        |
| Q22_Picture_last       | How long ago did you last experience it (in months)?                         | User entered integer |                        |
| Q23_Picture_days       | How long did the worm last in your eye (in days)?                            | User entered integer |                        |
| Q26_Nodules            | Do you have nodules under the skin (not fixed and not painful)?              | 1                    | Yes                    |
|                        |                                                                              | 2                    | No                     |
| STH                    | Hidden from user                                                             |                      |                        |
| Q28_School_urinate     | When you are at school, where do you usually go to urinate?                  | 1                    | In the school toilet   |
|                        |                                                                              | 2                    | Around school compound |
|                        |                                                                              |                      |                        |

|                     |                                                              |                                                                                                                                                                                                                                                                                                                                          |   |                            |   |                        |   |                            |   |                        |   |                |   |       |
|---------------------|--------------------------------------------------------------|------------------------------------------------------------------------------------------------------------------------------------------------------------------------------------------------------------------------------------------------------------------------------------------------------------------------------------------|---|----------------------------|---|------------------------|---|----------------------------|---|------------------------|---|----------------|---|-------|
|                     |                                                              | <table border="1"> <tr> <td>3</td> <td>Outside of school compound</td> </tr> <tr> <td>4</td> <td>In river/body of water</td> </tr> <tr> <td>5</td> <td>I wait/hold it</td> </tr> <tr> <td>6</td> <td>Other</td> </tr> </table>                                                                                                           | 3 | Outside of school compound | 4 | In river/body of water | 5 | I wait/hold it             | 6 | Other                  |   |                |   |       |
| 3                   | Outside of school compound                                   |                                                                                                                                                                                                                                                                                                                                          |   |                            |   |                        |   |                            |   |                        |   |                |   |       |
| 4                   | In river/body of water                                       |                                                                                                                                                                                                                                                                                                                                          |   |                            |   |                        |   |                            |   |                        |   |                |   |       |
| 5                   | I wait/hold it                                               |                                                                                                                                                                                                                                                                                                                                          |   |                            |   |                        |   |                            |   |                        |   |                |   |       |
| 6                   | Other                                                        |                                                                                                                                                                                                                                                                                                                                          |   |                            |   |                        |   |                            |   |                        |   |                |   |       |
| Q28a_Urinate_other  | If other, specify                                            | User entered text                                                                                                                                                                                                                                                                                                                        |   |                            |   |                        |   |                            |   |                        |   |                |   |       |
| Q29_School_defecate | When you are at school, where do you usually go to defecate? | <table border="1"> <tr> <td>1</td> <td>In the school toilet</td> </tr> <tr> <td>2</td> <td>Around school compound</td> </tr> <tr> <td>3</td> <td>Outside of school compound</td> </tr> <tr> <td>4</td> <td>In river/body of water</td> </tr> <tr> <td>5</td> <td>I wait/hold it</td> </tr> <tr> <td>6</td> <td>Other</td> </tr> </table> | 1 | In the school toilet       | 2 | Around school compound | 3 | Outside of school compound | 4 | In river/body of water | 5 | I wait/hold it | 6 | Other |
| 1                   | In the school toilet                                         |                                                                                                                                                                                                                                                                                                                                          |   |                            |   |                        |   |                            |   |                        |   |                |   |       |
| 2                   | Around school compound                                       |                                                                                                                                                                                                                                                                                                                                          |   |                            |   |                        |   |                            |   |                        |   |                |   |       |
| 3                   | Outside of school compound                                   |                                                                                                                                                                                                                                                                                                                                          |   |                            |   |                        |   |                            |   |                        |   |                |   |       |
| 4                   | In river/body of water                                       |                                                                                                                                                                                                                                                                                                                                          |   |                            |   |                        |   |                            |   |                        |   |                |   |       |
| 5                   | I wait/hold it                                               |                                                                                                                                                                                                                                                                                                                                          |   |                            |   |                        |   |                            |   |                        |   |                |   |       |
| 6                   | Other                                                        |                                                                                                                                                                                                                                                                                                                                          |   |                            |   |                        |   |                            |   |                        |   |                |   |       |
| Q29a_Defecate_other | If other, specify                                            | User entered text                                                                                                                                                                                                                                                                                                                        |   |                            |   |                        |   |                            |   |                        |   |                |   |       |
| Water               | Hidden from user                                             |                                                                                                                                                                                                                                                                                                                                          |   |                            |   |                        |   |                            |   |                        |   |                |   |       |
| Q30b_Bathing        | Bathing                                                      | <table border="1"> <tr> <td>1</td> <td>Yes</td> </tr> <tr> <td>2</td> <td>No</td> </tr> </table>                                                                                                                                                                                                                                         | 1 | Yes                        | 2 | No                     |   |                            |   |                        |   |                |   |       |
| 1                   | Yes                                                          |                                                                                                                                                                                                                                                                                                                                          |   |                            |   |                        |   |                            |   |                        |   |                |   |       |
| 2                   | No                                                           |                                                                                                                                                                                                                                                                                                                                          |   |                            |   |                        |   |                            |   |                        |   |                |   |       |
| Q30c_Washing        | Washing clothes/dishes                                       | <table border="1"> <tr> <td>1</td> <td>Yes</td> </tr> <tr> <td>2</td> <td>No</td> </tr> </table>                                                                                                                                                                                                                                         | 1 | Yes                        | 2 | No                     |   |                            |   |                        |   |                |   |       |
| 1                   | Yes                                                          |                                                                                                                                                                                                                                                                                                                                          |   |                            |   |                        |   |                            |   |                        |   |                |   |       |
| 2                   | No                                                           |                                                                                                                                                                                                                                                                                                                                          |   |                            |   |                        |   |                            |   |                        |   |                |   |       |
| Q30d_Fishing        | Fishing                                                      | <table border="1"> <tr> <td>1</td> <td>Yes</td> </tr> <tr> <td>2</td> <td>No</td> </tr> </table>                                                                                                                                                                                                                                         | 1 | Yes                        | 2 | No                     |   |                            |   |                        |   |                |   |       |
| 1                   | Yes                                                          |                                                                                                                                                                                                                                                                                                                                          |   |                            |   |                        |   |                            |   |                        |   |                |   |       |
| 2                   | No                                                           |                                                                                                                                                                                                                                                                                                                                          |   |                            |   |                        |   |                            |   |                        |   |                |   |       |
| Q30e_Crossing       | Crossing water                                               | <table border="1"> <tr> <td>1</td> <td>Yes</td> </tr> <tr> <td>2</td> <td>No</td> </tr> </table>                                                                                                                                                                                                                                         | 1 | Yes                        | 2 | No                     |   |                            |   |                        |   |                |   |       |
| 1                   | Yes                                                          |                                                                                                                                                                                                                                                                                                                                          |   |                            |   |                        |   |                            |   |                        |   |                |   |       |
| 2                   | No                                                           |                                                                                                                                                                                                                                                                                                                                          |   |                            |   |                        |   |                            |   |                        |   |                |   |       |
| Q30f_Fetching       | Fetching water                                               | <table border="1"> <tr> <td>1</td> <td>Yes</td> </tr> <tr> <td>2</td> <td>No</td> </tr> </table>                                                                                                                                                                                                                                         | 1 | Yes                        | 2 | No                     |   |                            |   |                        |   |                |   |       |
| 1                   | Yes                                                          |                                                                                                                                                                                                                                                                                                                                          |   |                            |   |                        |   |                            |   |                        |   |                |   |       |
| 2                   | No                                                           |                                                                                                                                                                                                                                                                                                                                          |   |                            |   |                        |   |                            |   |                        |   |                |   |       |
| Q30g_Playing        | Playing                                                      | <table border="1"> <tr> <td>1</td> <td>Yes</td> </tr> </table>                                                                                                                                                                                                                                                                           | 1 | Yes                        |   |                        |   |                            |   |                        |   |                |   |       |
| 1                   | Yes                                                          |                                                                                                                                                                                                                                                                                                                                          |   |                            |   |                        |   |                            |   |                        |   |                |   |       |

|                  |                        |                                                                                                  |   |     |   |    |
|------------------|------------------------|--------------------------------------------------------------------------------------------------|---|-----|---|----|
|                  |                        | <table border="1"> <tr> <td>2</td> <td>No</td> </tr> </table>                                    | 2 | No  |   |    |
| 2                | No                     |                                                                                                  |   |     |   |    |
| Q30h_Swimming    | Swimming               | <table border="1"> <tr> <td>1</td> <td>Yes</td> </tr> <tr> <td>2</td> <td>No</td> </tr> </table> | 1 | Yes | 2 | No |
| 1                | Yes                    |                                                                                                  |   |     |   |    |
| 2                | No                     |                                                                                                  |   |     |   |    |
| Q30j_No_activity | No activity            | <table border="1"> <tr> <td>1</td> <td>Yes</td> </tr> <tr> <td>2</td> <td>No</td> </tr> </table> | 1 | Yes | 2 | No |
| 1                | Yes                    |                                                                                                  |   |     |   |    |
| 2                | No                     |                                                                                                  |   |     |   |    |
| Q30a_None        | No nearby water bodies | <table border="1"> <tr> <td>1</td> <td>Yes</td> </tr> <tr> <td>2</td> <td>No</td> </tr> </table> | 1 | Yes | 2 | No |
| 1                | Yes                    |                                                                                                  |   |     |   |    |
| 2                | No                     |                                                                                                  |   |     |   |    |
| Q30k_Other       | Other (specify)        | User entered text                                                                                |   |     |   |    |
| Q31_Notes        | Additional notes       | User entered text                                                                                |   |     |   |    |
| Start_time       | Hidden from user       | Timestamp of form open                                                                           |   |     |   |    |
| End_time         | Hidden from user       | Timestamp of form save                                                                           |   |     |   |    |

## Gambia AFRO School WASH - Schisto STH v2 (eng)

| Variable Name   | Question Text                                          | Saved Value                                                                                                                                                                                                                                                                                                                                                                                                                                                                                                                                                                                                                           |   |                                    |   |                                               |   |                                                 |   |                    |   |                             |   |                                                 |   |                                  |   |                      |   |                   |    |              |    |       |
|-----------------|--------------------------------------------------------|---------------------------------------------------------------------------------------------------------------------------------------------------------------------------------------------------------------------------------------------------------------------------------------------------------------------------------------------------------------------------------------------------------------------------------------------------------------------------------------------------------------------------------------------------------------------------------------------------------------------------------------|---|------------------------------------|---|-----------------------------------------------|---|-------------------------------------------------|---|--------------------|---|-----------------------------|---|-------------------------------------------------|---|----------------------------------|---|----------------------|---|-------------------|----|--------------|----|-------|
| meta            | Hidden from user                                       |                                                                                                                                                                                                                                                                                                                                                                                                                                                                                                                                                                                                                                       |   |                                    |   |                                               |   |                                                 |   |                    |   |                             |   |                                                 |   |                                  |   |                      |   |                   |    |              |    |       |
| instanceID      | Hidden from user                                       |                                                                                                                                                                                                                                                                                                                                                                                                                                                                                                                                                                                                                                       |   |                                    |   |                                               |   |                                                 |   |                    |   |                             |   |                                                 |   |                                  |   |                      |   |                   |    |              |    |       |
| Q1_Recorder     | Enter Recorder ID                                      | User entered integer                                                                                                                                                                                                                                                                                                                                                                                                                                                                                                                                                                                                                  |   |                                    |   |                                               |   |                                                 |   |                    |   |                             |   |                                                 |   |                                  |   |                      |   |                   |    |              |    |       |
| Q2a_School1     | Enter school code                                      | User entered integer                                                                                                                                                                                                                                                                                                                                                                                                                                                                                                                                                                                                                  |   |                                    |   |                                               |   |                                                 |   |                    |   |                             |   |                                                 |   |                                  |   |                      |   |                   |    |              |    |       |
| Q2b_School2     | Enter school code again                                | User entered integer                                                                                                                                                                                                                                                                                                                                                                                                                                                                                                                                                                                                                  |   |                                    |   |                                               |   |                                                 |   |                    |   |                             |   |                                                 |   |                                  |   |                      |   |                   |    |              |    |       |
| Prompt1         | Ask teacher following questions                        | User entered text                                                                                                                                                                                                                                                                                                                                                                                                                                                                                                                                                                                                                     |   |                                    |   |                                               |   |                                                 |   |                    |   |                             |   |                                                 |   |                                  |   |                      |   |                   |    |              |    |       |
| Q3_Water_source | Is there a source of drinking water in the school?     | <table border="1"> <tr> <td>1</td> <td>Yes</td> </tr> <tr> <td>2</td> <td>No</td> </tr> </table>                                                                                                                                                                                                                                                                                                                                                                                                                                                                                                                                      | 1 | Yes                                | 2 | No                                            |   |                                                 |   |                    |   |                             |   |                                                 |   |                                  |   |                      |   |                   |    |              |    |       |
| 1               | Yes                                                    |                                                                                                                                                                                                                                                                                                                                                                                                                                                                                                                                                                                                                                       |   |                                    |   |                                               |   |                                                 |   |                    |   |                             |   |                                                 |   |                                  |   |                      |   |                   |    |              |    |       |
| 2               | No                                                     |                                                                                                                                                                                                                                                                                                                                                                                                                                                                                                                                                                                                                                       |   |                                    |   |                                               |   |                                                 |   |                    |   |                             |   |                                                 |   |                                  |   |                      |   |                   |    |              |    |       |
| Q4_Water_where  | Where is the source of drinking water?                 | <table border="1"> <tr> <td>1</td> <td>In the school</td> </tr> <tr> <td>2</td> <td>15 minutes or less round-trip from the school</td> </tr> <tr> <td>3</td> <td>More than 15 minutes round-trip from the school</td> </tr> </table>                                                                                                                                                                                                                                                                                                                                                                                                  | 1 | In the school                      | 2 | 15 minutes or less round-trip from the school | 3 | More than 15 minutes round-trip from the school |   |                    |   |                             |   |                                                 |   |                                  |   |                      |   |                   |    |              |    |       |
| 1               | In the school                                          |                                                                                                                                                                                                                                                                                                                                                                                                                                                                                                                                                                                                                                       |   |                                    |   |                                               |   |                                                 |   |                    |   |                             |   |                                                 |   |                                  |   |                      |   |                   |    |              |    |       |
| 2               | 15 minutes or less round-trip from the school          |                                                                                                                                                                                                                                                                                                                                                                                                                                                                                                                                                                                                                                       |   |                                    |   |                                               |   |                                                 |   |                    |   |                             |   |                                                 |   |                                  |   |                      |   |                   |    |              |    |       |
| 3               | More than 15 minutes round-trip from the school        |                                                                                                                                                                                                                                                                                                                                                                                                                                                                                                                                                                                                                                       |   |                                    |   |                                               |   |                                                 |   |                    |   |                             |   |                                                 |   |                                  |   |                      |   |                   |    |              |    |       |
| Q5_Water_type   | What type of water source?                             | <table border="1"> <tr> <td>1</td> <td>Unprotected spring</td> </tr> <tr> <td>2</td> <td>Protected spring</td> </tr> <tr> <td>3</td> <td>Unprotected dug well</td> </tr> <tr> <td>4</td> <td>Protected dug well</td> </tr> <tr> <td>5</td> <td>Hand pump/tubewell/borehole</td> </tr> <tr> <td>6</td> <td>Surface water (river, dam, lake, stream, canal)</td> </tr> <tr> <td>7</td> <td>Public piped water/tap/standpipe</td> </tr> <tr> <td>8</td> <td>Rainwater collection</td> </tr> <tr> <td>9</td> <td>Plastic bag water</td> </tr> <tr> <td>10</td> <td>Bottle water</td> </tr> <tr> <td>11</td> <td>Other</td> </tr> </table> | 1 | Unprotected spring                 | 2 | Protected spring                              | 3 | Unprotected dug well                            | 4 | Protected dug well | 5 | Hand pump/tubewell/borehole | 6 | Surface water (river, dam, lake, stream, canal) | 7 | Public piped water/tap/standpipe | 8 | Rainwater collection | 9 | Plastic bag water | 10 | Bottle water | 11 | Other |
| 1               | Unprotected spring                                     |                                                                                                                                                                                                                                                                                                                                                                                                                                                                                                                                                                                                                                       |   |                                    |   |                                               |   |                                                 |   |                    |   |                             |   |                                                 |   |                                  |   |                      |   |                   |    |              |    |       |
| 2               | Protected spring                                       |                                                                                                                                                                                                                                                                                                                                                                                                                                                                                                                                                                                                                                       |   |                                    |   |                                               |   |                                                 |   |                    |   |                             |   |                                                 |   |                                  |   |                      |   |                   |    |              |    |       |
| 3               | Unprotected dug well                                   |                                                                                                                                                                                                                                                                                                                                                                                                                                                                                                                                                                                                                                       |   |                                    |   |                                               |   |                                                 |   |                    |   |                             |   |                                                 |   |                                  |   |                      |   |                   |    |              |    |       |
| 4               | Protected dug well                                     |                                                                                                                                                                                                                                                                                                                                                                                                                                                                                                                                                                                                                                       |   |                                    |   |                                               |   |                                                 |   |                    |   |                             |   |                                                 |   |                                  |   |                      |   |                   |    |              |    |       |
| 5               | Hand pump/tubewell/borehole                            |                                                                                                                                                                                                                                                                                                                                                                                                                                                                                                                                                                                                                                       |   |                                    |   |                                               |   |                                                 |   |                    |   |                             |   |                                                 |   |                                  |   |                      |   |                   |    |              |    |       |
| 6               | Surface water (river, dam, lake, stream, canal)        |                                                                                                                                                                                                                                                                                                                                                                                                                                                                                                                                                                                                                                       |   |                                    |   |                                               |   |                                                 |   |                    |   |                             |   |                                                 |   |                                  |   |                      |   |                   |    |              |    |       |
| 7               | Public piped water/tap/standpipe                       |                                                                                                                                                                                                                                                                                                                                                                                                                                                                                                                                                                                                                                       |   |                                    |   |                                               |   |                                                 |   |                    |   |                             |   |                                                 |   |                                  |   |                      |   |                   |    |              |    |       |
| 8               | Rainwater collection                                   |                                                                                                                                                                                                                                                                                                                                                                                                                                                                                                                                                                                                                                       |   |                                    |   |                                               |   |                                                 |   |                    |   |                             |   |                                                 |   |                                  |   |                      |   |                   |    |              |    |       |
| 9               | Plastic bag water                                      |                                                                                                                                                                                                                                                                                                                                                                                                                                                                                                                                                                                                                                       |   |                                    |   |                                               |   |                                                 |   |                    |   |                             |   |                                                 |   |                                  |   |                      |   |                   |    |              |    |       |
| 10              | Bottle water                                           |                                                                                                                                                                                                                                                                                                                                                                                                                                                                                                                                                                                                                                       |   |                                    |   |                                               |   |                                                 |   |                    |   |                             |   |                                                 |   |                                  |   |                      |   |                   |    |              |    |       |
| 11              | Other                                                  |                                                                                                                                                                                                                                                                                                                                                                                                                                                                                                                                                                                                                                       |   |                                    |   |                                               |   |                                                 |   |                    |   |                             |   |                                                 |   |                                  |   |                      |   |                   |    |              |    |       |
| Q5a_Water_other | If other, specify                                      | User entered text                                                                                                                                                                                                                                                                                                                                                                                                                                                                                                                                                                                                                     |   |                                    |   |                                               |   |                                                 |   |                    |   |                             |   |                                                 |   |                                  |   |                      |   |                   |    |              |    |       |
| Q6_Water_bodies | Are there accessible water bodies close to the school? | <table border="1"> <tr> <td>1</td> <td>Yes- 15 minutes of less round-trip</td> </tr> <tr> <td>2</td> <td>Yes - more than 15 minutes round-trip</td> </tr> <tr> <td>3</td> <td>No</td> </tr> </table>                                                                                                                                                                                                                                                                                                                                                                                                                                  | 1 | Yes- 15 minutes of less round-trip | 2 | Yes - more than 15 minutes round-trip         | 3 | No                                              |   |                    |   |                             |   |                                                 |   |                                  |   |                      |   |                   |    |              |    |       |
| 1               | Yes- 15 minutes of less round-trip                     |                                                                                                                                                                                                                                                                                                                                                                                                                                                                                                                                                                                                                                       |   |                                    |   |                                               |   |                                                 |   |                    |   |                             |   |                                                 |   |                                  |   |                      |   |                   |    |              |    |       |
| 2               | Yes - more than 15 minutes round-trip                  |                                                                                                                                                                                                                                                                                                                                                                                                                                                                                                                                                                                                                                       |   |                                    |   |                                               |   |                                                 |   |                    |   |                             |   |                                                 |   |                                  |   |                      |   |                   |    |              |    |       |
| 3               | No                                                     |                                                                                                                                                                                                                                                                                                                                                                                                                                                                                                                                                                                                                                       |   |                                    |   |                                               |   |                                                 |   |                    |   |                             |   |                                                 |   |                                  |   |                      |   |                   |    |              |    |       |

|                        |                                                        |                   |                                                                                            |
|------------------------|--------------------------------------------------------|-------------------|--------------------------------------------------------------------------------------------|
| Q7_Latrine             | Is there a latrine in the school?                      | 1                 | Yes                                                                                        |
|                        |                                                        | 2                 | No                                                                                         |
| Q7a_Latrine_water      | Is there water or tissue for use after defecating?     | 1                 | Always                                                                                     |
|                        |                                                        | 2                 | Sometimes                                                                                  |
|                        |                                                        | 3                 | Never                                                                                      |
| Latrine                | Hidden from user                                       |                   |                                                                                            |
| Prompt2                | Observe latrine                                        | User entered text |                                                                                            |
| Q8a_Latrine_type       | What type of latrine is present?                       | 1                 | Pit latrine without slab or open pit                                                       |
|                        |                                                        | 2                 | Pit latrine with slab                                                                      |
|                        |                                                        | 3                 | Ventilated improved pit latrine (VIP)                                                      |
|                        |                                                        | 4                 | Flush or pour flush toilet                                                                 |
|                        |                                                        | 5                 | Other                                                                                      |
| Q8b_Latrine_type_other | If other, specify                                      | User entered text |                                                                                            |
| Q8c_Latrine_condition  | What is the condition of the latrine?                  | 1                 | Poor (presence of flies, offensive odour and visible stool on floor, absence of roof/door) |
|                        |                                                        | 2                 | Fair (presence of roof/door but dirty floor)                                               |
|                        |                                                        | 3                 | Moderate (clean, absence of roof/door)                                                     |
|                        |                                                        | 4                 | Good (clean, odourless, no flies, presence of roof and door)                               |
|                        |                                                        | 5                 | Excellent (Very clean, odourless, presence of door, roof, and availability of water)       |
| Q8d_Latrine_water      | Is there water or tissue for use after defecating?     | 1                 | Yes                                                                                        |
|                        |                                                        | 2                 | No                                                                                         |
| Q8e_Latrine_hand       | Is there provision for hand washing after latrine use? | 1                 | Yes                                                                                        |
|                        |                                                        | 2                 | No                                                                                         |
| Q8f_Latrine_hand_type  | What type of hand washing facilities are available?    | 1                 | No water                                                                                   |
|                        |                                                        | 2                 | Water only                                                                                 |
|                        |                                                        | 3                 | Water and soap                                                                             |

|                        |                   |                        |                                        |
|------------------------|-------------------|------------------------|----------------------------------------|
|                        |                   | 4                      | Water, soap, and non-disposable napkin |
|                        |                   | 5                      | Water, soap, and disposable napkin     |
|                        |                   | 6                      | Other                                  |
| Q8g_Latrine_hand_other | If other, specify | User entered text      |                                        |
| Q9_Notes               | Additional notes  | User entered text      |                                        |
| Start_time             | Hidden from user  | Timestamp of form open |                                        |
| End_time               | Hidden from user  | Timestamp of form save |                                        |



## Gambia AFRO Urine Results v2 (eng)

| Variable Name       | Question Text                                                | Saved Value                                                                                                                                                                                                                                                 |   |          |   |              |   |             |   |                   |   |                    |
|---------------------|--------------------------------------------------------------|-------------------------------------------------------------------------------------------------------------------------------------------------------------------------------------------------------------------------------------------------------------|---|----------|---|--------------|---|-------------|---|-------------------|---|--------------------|
| meta                | Hidden from user                                             |                                                                                                                                                                                                                                                             |   |          |   |              |   |             |   |                   |   |                    |
| instanceID          | Hidden from user                                             |                                                                                                                                                                                                                                                             |   |          |   |              |   |             |   |                   |   |                    |
| Q1_Recorder         | Enter Recorder ID                                            | User entered integer                                                                                                                                                                                                                                        |   |          |   |              |   |             |   |                   |   |                    |
| Q2a_Barcode         | Barcode scan or manual?                                      | <table border="1"> <tr> <td>1</td> <td>Scan</td> </tr> <tr> <td>2</td> <td>Manual</td> </tr> </table>                                                                                                                                                       | 1 | Scan     | 2 | Manual       |   |             |   |                   |   |                    |
| 1                   | Scan                                                         |                                                                                                                                                                                                                                                             |   |          |   |              |   |             |   |                   |   |                    |
| 2                   | Manual                                                       |                                                                                                                                                                                                                                                             |   |          |   |              |   |             |   |                   |   |                    |
| Q2b_Scan            | Enter barcode                                                | User captured barcode                                                                                                                                                                                                                                       |   |          |   |              |   |             |   |                   |   |                    |
| Q2c_Manual1         | Enter barcode                                                | User entered text                                                                                                                                                                                                                                           |   |          |   |              |   |             |   |                   |   |                    |
| Q2d_Manual2         | Enter barcode again                                          | User entered text                                                                                                                                                                                                                                           |   |          |   |              |   |             |   |                   |   |                    |
| Q3_Colour           | Urine colour                                                 | <table border="1"> <tr> <td>1</td> <td>Bloody</td> </tr> <tr> <td>2</td> <td>Amber/cloudy</td> </tr> <tr> <td>3</td> <td>Amber/clear</td> </tr> <tr> <td>4</td> <td>Pale yellow/clear</td> </tr> <tr> <td>5</td> <td>Pale yellow/cloudy</td> </tr> </table> | 1 | Bloody   | 2 | Amber/cloudy | 3 | Amber/clear | 4 | Pale yellow/clear | 5 | Pale yellow/cloudy |
| 1                   | Bloody                                                       |                                                                                                                                                                                                                                                             |   |          |   |              |   |             |   |                   |   |                    |
| 2                   | Amber/cloudy                                                 |                                                                                                                                                                                                                                                             |   |          |   |              |   |             |   |                   |   |                    |
| 3                   | Amber/clear                                                  |                                                                                                                                                                                                                                                             |   |          |   |              |   |             |   |                   |   |                    |
| 4                   | Pale yellow/clear                                            |                                                                                                                                                                                                                                                             |   |          |   |              |   |             |   |                   |   |                    |
| 5                   | Pale yellow/cloudy                                           |                                                                                                                                                                                                                                                             |   |          |   |              |   |             |   |                   |   |                    |
| Q4_Test             | Select test                                                  | <table border="1"> <tr> <td>1</td> <td>Dipstick</td> </tr> <tr> <td>2</td> <td>CCA</td> </tr> </table>                                                                                                                                                      | 1 | Dipstick | 2 | CCA          |   |             |   |                   |   |                    |
| 1                   | Dipstick                                                     |                                                                                                                                                                                                                                                             |   |          |   |              |   |             |   |                   |   |                    |
| 2                   | CCA                                                          |                                                                                                                                                                                                                                                             |   |          |   |              |   |             |   |                   |   |                    |
| Q4a_Dipstick_result | HEM urine dipstick result                                    | <table border="1"> <tr> <td>1</td> <td>Negative</td> </tr> <tr> <td>2</td> <td>Trace</td> </tr> <tr> <td>3</td> <td>+</td> </tr> <tr> <td>4</td> <td>++</td> </tr> <tr> <td>5</td> <td>+++</td> </tr> </table>                                              | 1 | Negative | 2 | Trace        | 3 | +           | 4 | ++                | 5 | +++                |
| 1                   | Negative                                                     |                                                                                                                                                                                                                                                             |   |          |   |              |   |             |   |                   |   |                    |
| 2                   | Trace                                                        |                                                                                                                                                                                                                                                             |   |          |   |              |   |             |   |                   |   |                    |
| 3                   | +                                                            |                                                                                                                                                                                                                                                             |   |          |   |              |   |             |   |                   |   |                    |
| 4                   | ++                                                           |                                                                                                                                                                                                                                                             |   |          |   |              |   |             |   |                   |   |                    |
| 5                   | +++                                                          |                                                                                                                                                                                                                                                             |   |          |   |              |   |             |   |                   |   |                    |
| Q4b_Dipstick_eggs   | Number of Schistosoma haematobium eggs observed (filtration) | User entered integer                                                                                                                                                                                                                                        |   |          |   |              |   |             |   |                   |   |                    |
| Q4c_CCA_result      | CCA results                                                  | <table border="1"> <tr> <td>1</td> <td>Positive</td> </tr> <tr> <td>2</td> <td>Negative</td> </tr> <tr> <td>9</td> <td>Not tested</td> </tr> </table>                                                                                                       | 1 | Positive | 2 | Negative     | 9 | Not tested  |   |                   |   |                    |
| 1                   | Positive                                                     |                                                                                                                                                                                                                                                             |   |          |   |              |   |             |   |                   |   |                    |
| 2                   | Negative                                                     |                                                                                                                                                                                                                                                             |   |          |   |              |   |             |   |                   |   |                    |
| 9                   | Not tested                                                   |                                                                                                                                                                                                                                                             |   |          |   |              |   |             |   |                   |   |                    |
| Q4d_CCA_not         | Why was test not done?                                       | User entered text                                                                                                                                                                                                                                           |   |          |   |              |   |             |   |                   |   |                    |

|            |                  |                        |
|------------|------------------|------------------------|
| Q5_Notes   | Additional notes | User entered text      |
| Start_time | Hidden from user | Timestamp of form open |
| End_time   | Hidden from user | Timestamp of form save |

## Gambia AFRO Stool Results v2 (eng)

| Variable Name         | Question Text                                     | Saved Value                                                                                             |   |           |   |        |
|-----------------------|---------------------------------------------------|---------------------------------------------------------------------------------------------------------|---|-----------|---|--------|
| meta                  | Hidden from user                                  |                                                                                                         |   |           |   |        |
| instanceID            | Hidden from user                                  |                                                                                                         |   |           |   |        |
| Q1_Recorder           | Enter Recorder ID                                 | User entered integer                                                                                    |   |           |   |        |
| Q2a_Barcode           | Barcode scan or manual?                           | <table border="1"> <tr> <td>1</td> <td>Scan</td> </tr> <tr> <td>2</td> <td>Manual</td> </tr> </table>   | 1 | Scan      | 2 | Manual |
| 1                     | Scan                                              |                                                                                                         |   |           |   |        |
| 2                     | Manual                                            |                                                                                                         |   |           |   |        |
| Q2b_Scan              | Scan Barcode                                      | User captured barcode                                                                                   |   |           |   |        |
| Q2c_Manual1           | Enter barcode                                     | User entered text                                                                                       |   |           |   |        |
| Q2d_Manual2           | Enter barcode again                               | User entered text                                                                                       |   |           |   |        |
| Q2e_Test              | Select test                                       | <table border="1"> <tr> <td>1</td> <td>Kato Katz</td> </tr> <tr> <td>2</td> <td>PCR</td> </tr> </table> | 1 | Kato Katz | 2 | PCR    |
| 1                     | Kato Katz                                         |                                                                                                         |   |           |   |        |
| 2                     | PCR                                               |                                                                                                         |   |           |   |        |
| KK                    | Hidden from user                                  |                                                                                                         |   |           |   |        |
| Q3_Ascaris            | Ascaris lumbricoides detected?                    | <table border="1"> <tr> <td>1</td> <td>Yes</td> </tr> <tr> <td>2</td> <td>No</td> </tr> </table>        | 1 | Yes       | 2 | No     |
| 1                     | Yes                                               |                                                                                                         |   |           |   |        |
| 2                     | No                                                |                                                                                                         |   |           |   |        |
| Q3a_Ascaris_count     | Enter number of Ascaris eggs observed             | User entered integer                                                                                    |   |           |   |        |
| Q4_Trichuris          | Trichuris trichuria detected?                     | <table border="1"> <tr> <td>1</td> <td>Yes</td> </tr> <tr> <td>2</td> <td>No</td> </tr> </table>        | 1 | Yes       | 2 | No     |
| 1                     | Yes                                               |                                                                                                         |   |           |   |        |
| 2                     | No                                                |                                                                                                         |   |           |   |        |
| Q4a_Trichuris_count   | Enter number of Trichuris eggs observed           | User entered integer                                                                                    |   |           |   |        |
| Q5_Hookworm           | Hookworm detected?                                | <table border="1"> <tr> <td>1</td> <td>Yes</td> </tr> <tr> <td>2</td> <td>No</td> </tr> </table>        | 1 | Yes       | 2 | No     |
| 1                     | Yes                                               |                                                                                                         |   |           |   |        |
| 2                     | No                                                |                                                                                                         |   |           |   |        |
| Q5a_Hookworm_count    | Enter number of Hookworm eggs observed            | User entered integer                                                                                    |   |           |   |        |
| Q6_Schistosoma        | Schistosoma mansoni detected?                     | <table border="1"> <tr> <td>1</td> <td>Yes</td> </tr> <tr> <td>2</td> <td>No</td> </tr> </table>        | 1 | Yes       | 2 | No     |
| 1                     | Yes                                               |                                                                                                         |   |           |   |        |
| 2                     | No                                                |                                                                                                         |   |           |   |        |
| Q6a_Schistosoma_count | Enter number of Schistosoma mansoni eggs observed | User entered integer                                                                                    |   |           |   |        |
| Q7_PCR                | Was sample for PCR collected?                     | <table border="1"> <tr> <td>1</td> <td>Yes</td> </tr> </table>                                          | 1 | Yes       |   |        |
| 1                     | Yes                                               |                                                                                                         |   |           |   |        |

|             |                  |                        |    |
|-------------|------------------|------------------------|----|
|             |                  | 2                      | No |
| Q7a_PCR_not | If not, why not? | User entered text      |    |
| Q8_Notes    | Additional notes | User entered text      |    |
| Start_time  | Hidden from user | Timestamp of form open |    |
| End_time    | Hidden from user | Timestamp of form save |    |
